# Supplementary material for: Extraordinary lattice thermal conductivity of gold sulfide monolayers
Source: Royal Society of Chemistry journal article supplement (doi:10.1039/d2na00019a), 2022-01-01

# Supporting Information

## Extraordinary thermal conductivity of gold sulfide monolayers

Armin Taheri<sup>1</sup>, Simone Pisana<sup>1,2</sup>, Chandra Veer Singh<sup>3,\*</sup>

<sup>1</sup>Department of Electrical Engineering and Computer Science, York University,  
Toronto, Ontario M3J1P3, Canada.

<sup>2</sup>Department of Physics and Astronomy, York University,  
Toronto, Ontario M3J1P3, Canada.

<sup>3</sup>Department of Materials Science and Engineering, University of Toronto,  
Toronto, Ontario M5S3E4, Canada.

\*Corresponding author; [chandraveer.singh@utoronto.ca](mailto:chandraveer.singh@utoronto.ca)

# 1. Convergence of thermal conductivity of gold sulfide monolayers with q-point sampling number

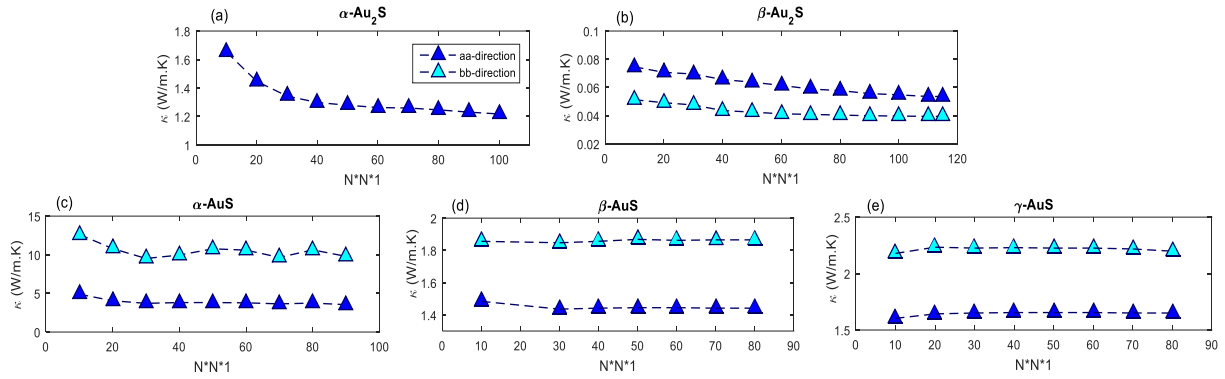

## 2. Comparison between the predicted thermal conductivity of gold sulfide monolayers obtained base on the iterative and RTA solution of the BTE

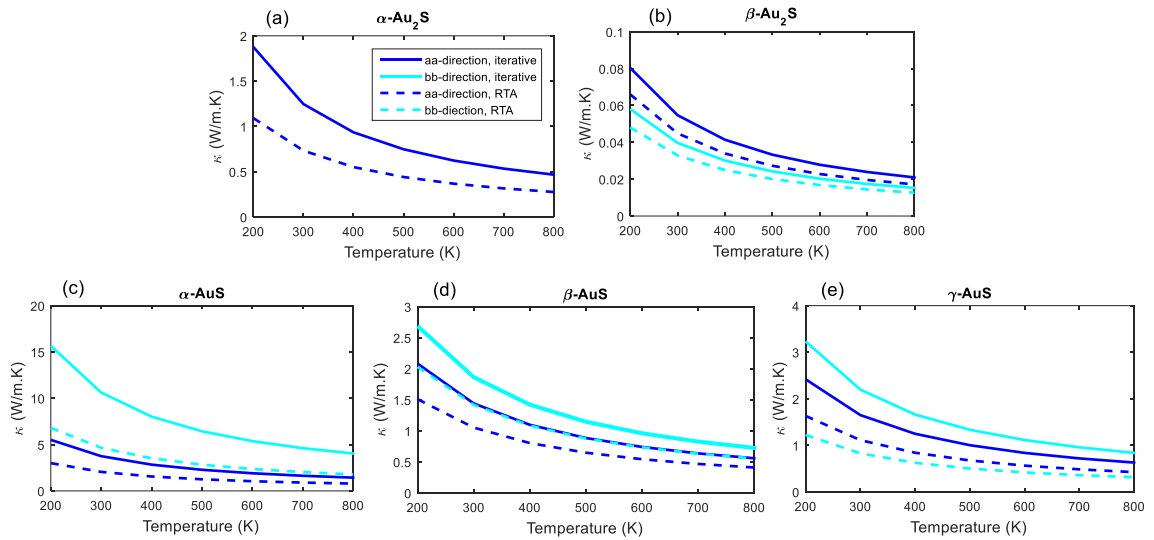

Supplement: d2na00019a1.pdf [file d2na00019a1.pdf]
